# Supplementary material for: Rationally designed anionic diblock copolymer worm gels are useful model systems for calcite occlusion studies
Source: Royal Society of Chemistry journal article supplement (doi:10.1039/c9py00889f), 2019-01-01
Supplement: c9py00889f1.pdf [file c9py00889f1.pdf]

Supporting Information for:

## Rationally designed anionic diblock copolymer worm gels are useful model systems for calcite occlusion studies

Lee A. Fielding, \* Coit T. Hendley IV, Emily Asenath-Smith, Lara A. Estroff and Steven P. Armes

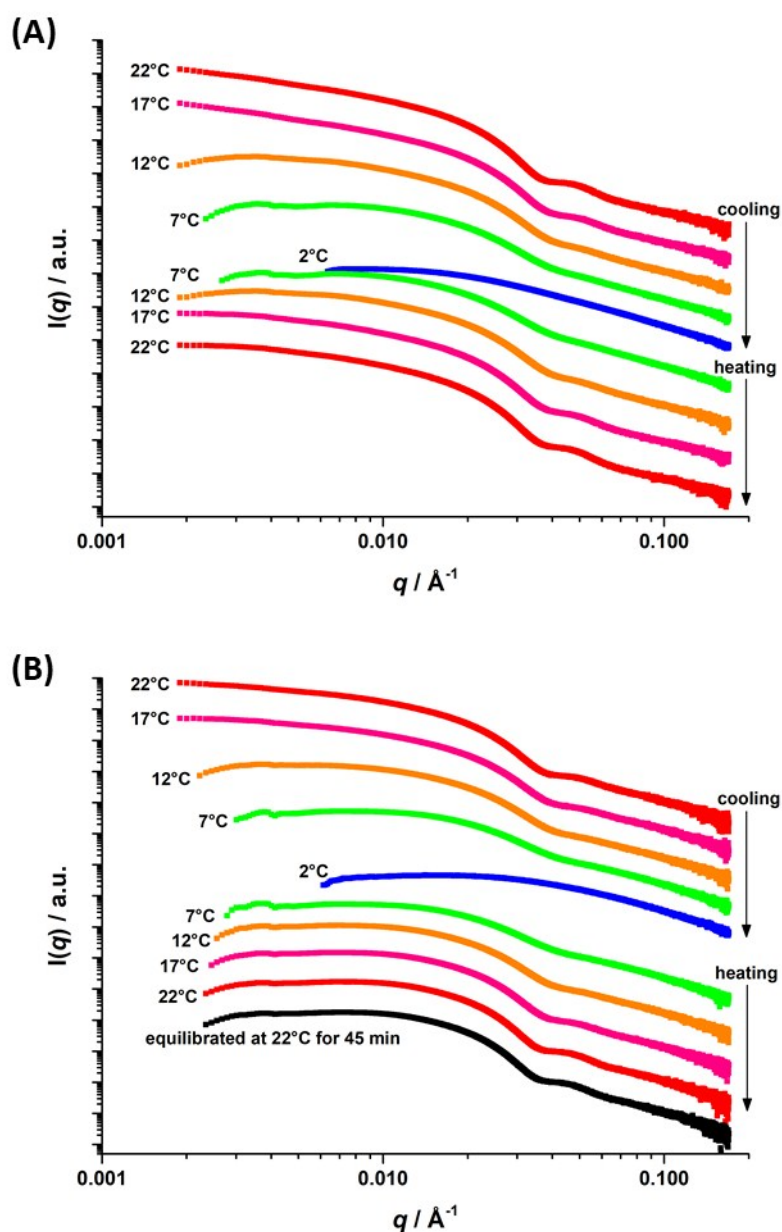

**Figure S1.** Small-angle X-ray scattering patterns recorded for  $[\text{nPMAA}_{85} + (1-\text{n})\text{PGMA}_{48}]$ - $\text{PHPMA}_{140}$  5.0 % w/w worm gels where (A)  $n = 0$  and (B)  $n = 0.15$ . The temperature was cycled between 22 and 2 °C in the steps indicated on the plots and the sample was allowed to equilibrate for 5 minutes at each step.

**Table S1.** Summary of models<sup>a</sup> and various structural parameters obtained from fitting SAXS patterns recorded for 1.0 % w/w aqueous dispersions of copolymer nano-objects from Figure 4.

| Sample Composition                                           | Model <sup>a</sup> | $\Phi_1^b$ | $R^c / \text{Å}$ | $\sigma_R / \text{Å}$ | $L_c^d / \text{Å}$ | $L_k^d / \text{Å}$ | $T_m^e / \text{Å}$ | $\sigma_{Tm} / \text{Å}$ | $\Phi_2^b$ |
|--------------------------------------------------------------|--------------------|------------|------------------|-----------------------|--------------------|--------------------|--------------------|--------------------------|------------|
| [0.5M <sub>37</sub> +0.5G <sub>68</sub> ]-H <sub>250</sub>   | Vesicle            | 0.0103     | 804              | 259                   |                    |                    | 182                | 25                       | 0.0027     |
| [0.1M <sub>37</sub> +0.9G <sub>68</sub> ]-H <sub>200</sub>   | Vesicle            | 0.0122     | 1012             | 312                   |                    |                    | 126                | 22                       | 0.0007     |
| [0.2M <sub>37</sub> +0.8G <sub>68</sub> ]-H <sub>150</sub>   | Worm               | 0.0022     | 97               | 15                    | 784                | 25                 |                    |                          | 0.0024     |
| [0.6M <sub>37</sub> +0.4G <sub>68</sub> ]-H <sub>200</sub>   | Sphere             | 0.0054     | 292              | 47                    |                    |                    |                    |                          | 0.0030     |
| [0.6M <sub>37</sub> +0.4G <sub>68</sub> ]-H <sub>100</sub>   | Sphere             | 0.0044     | 207              | 34                    |                    |                    |                    |                          | 0.0040     |
| M <sub>37</sub> -H <sub>300</sub>                            | Sphere             | 0.0047     | 252              | 36                    |                    |                    |                    |                          | 0.0054     |
| [0.2M <sub>85</sub> +0.8G <sub>62</sub> ]-H <sub>300</sub>   | Vesicle            | 0.0117     | 1415             | 531                   |                    |                    | 358                | 67                       | 0.0011     |
| [0.05M <sub>85</sub> +0.95G <sub>62</sub> ]-H <sub>200</sub> | Vesicle            | 0.0200     | 1135             | 360                   |                    |                    | 140                | 20                       | 0.0014     |
| [0.2M <sub>85</sub> +0.8G <sub>62</sub> ]-H <sub>150</sub>   | Worm               | 0.0043     | 100              | 9                     | 500                | 108                |                    |                          | 0.0029     |
| [0.05M <sub>85</sub> +0.95G <sub>62</sub> ]-H <sub>150</sub> | Worm               | 0.0054     | 94               | 13                    | 1298               | 170                |                    |                          | 0.0029     |
| [0.3M <sub>85</sub> +0.7G <sub>62</sub> ]-H <sub>200</sub>   | Sphere             | 0.0064     | 406              | 48                    |                    |                    |                    |                          | 0.0014     |
| [0.05M <sub>85</sub> +0.95G <sub>62</sub> ]-H <sub>75</sub>  | Sphere             | 0.0047     | 87               | 8                     |                    |                    |                    |                          | 0.0048     |

<sup>a</sup> Data collected for 1.0 % w/w aqueous dispersions of nano-objects were fitted to a two-population model of either spherical micelles (Sphere), worm-like micelles (Worm) or copolymer vesicles (Vesicle) plus Gaussian polymer chains. The total scattering intensity,  $I(q)$ , is represented by:

$$I(q) = \frac{d\Sigma}{d\Omega}(q)_s + \frac{d\Sigma}{d\Omega}(q)_c$$
 where  $\frac{d\Sigma}{d\Omega}(q)_s$  is the scattering cross-section per unit sample volume of the first population and  $\frac{d\Sigma}{d\Omega}(q)_c$  is the scattering cross-section per unit sample volume of Gaussian polymer chains. Additional descriptions of these models are given below.

<sup>b</sup>  $\Phi_1$  and  $\Phi_2$  represent the volume fraction of the 1<sup>st</sup> population and Gaussian polymer chains, respectively.

<sup>c</sup>  $R$  represents either the radius of the spherical core, worm-cross section or outer vesicle radius.

<sup>d</sup>  $L_c$  and  $L_k$  are the worm contour length and Kuhn length, respectively.

<sup>e</sup>  $T_m$  represents the vesicle wall thickness.

## SAXS models

Programming tools within Irena SAS Igor Pro macros<sup>1</sup> were used to implement model fitting.

The SAXS models used in this work have been described in detail before and can be found at the following sources:

| Model                                | Location                         | DOI                                                                                     |
|--------------------------------------|----------------------------------|-----------------------------------------------------------------------------------------|
| Gaussian polymer chains <sup>2</sup> | Supporting information, page S10 | <a href="https://doi.org/10.1021/acs.macromol.6b00987">10.1021/acs.macromol.6b00987</a> |
| Spherical micelles <sup>2</sup>      | Supporting information, page S11 | <a href="https://doi.org/10.1021/acs.macromol.6b00987">10.1021/acs.macromol.6b00987</a> |
| Worm-like micelles <sup>3</sup>      | Supporting information, page S3  | <a href="https://doi.org/10.1021/ja501756h">10.1021/ja501756h</a>                       |
| Copolymer vesicles <sup>4</sup>      | Supporting information, page S14 | <a href="https://doi.org/10.1039/C6SC01243D">10.1039/C6SC01243D</a>                     |

All X-ray scattering length densities ( $\zeta$ ) were calculated using Irena SAS Igor Pro macros<sup>1</sup> using homopolymer densities measured by helium pycnometry, where appropriate. Specifically:  $\zeta_{\text{PHPMA}} = 11.11 \times 10^{10} \text{ cm}^{-2}$ ;  $\zeta_{\text{PGMA}} = 11.94 \times 10^{10} \text{ cm}^{-2}$ ;  $\zeta_{\text{PMAA}} = 10.88 \times 10^{10} \text{ cm}^{-2}$  and the solvent,  $\zeta_{\text{H}_2\text{O}} = 9.42 \times 10^{10} \text{ cm}^{-2}$ . Calculated volumes of the core and the corona block used in model fitting were obtained from  $V = M_w / (N_A \rho)$ , using homopolymer densities determined by helium pycnometry.

## References

1. Ilavsky, J.; Jemian, P. R. Irena: tool suite for modeling and analysis of small-angle scattering. *J. Appl. Crystallogr.* **2009**, *42*, 347-353.
2. Akpınar, B.; Fielding, L. A.; Cunningham, V. J.; Ning, Y.; Mykhaylyk, O. O.; Fowler, P. W.; Armes, S. P. Determining the Effective Density and Stabilizer Layer Thickness of Sterically Stabilized Nanoparticles. *Macromolecules* **2016**, *49*, (14), 5160-5171.
3. Fielding, L. A.; Lane, J. A.; Derry, M. J.; Mykhaylyk, O. O.; Armes, S. P. Thermo-responsive diblock copolymer worm gels in non-polar solvents. *J. Am. Chem. Soc.* **2014**, *136*, (15), 5790-5798.
4. Derry, M. J.; Fielding, L. A.; Warren, N. J.; Mable, C. J.; Smith, A. J.; Mykhaylyk, O. O.; Armes, S. P. In situ small-angle X-ray scattering studies of sterically-stabilized diblock copolymer nanoparticles formed during polymerization-induced self-assembly in non-polar media. *Chemical Science* **2016**, *7*, (8), 5078-5090.
